# Supplementary material for: CTAB@BiOCl: a highly adsorptive photocatalyst for eliminating dye contamination
Source: Royal Society of Chemistry journal article supplement (doi:10.1039/c5ra27714k), 2016-01-01
Supplement: c5ra27714k1.pdf [file c5ra27714k1.pdf]

## Supplementary Material

### CTAB@BiOCl: a highly adsorptive photocatalyst for eliminating dyes contamination

Yichang Yu<sup>a</sup>, Zhangjun Hu<sup>b</sup>, Yalei Zhang<sup>a</sup>, Hongwen Gao<sup>a\*</sup>

<sup>a</sup> State Key Laboratory of Pollution Control and Resource Reuse, College of Environmental Science and Engineering, Tongji University, Shanghai 200092, P.R. China

<sup>b</sup> Division of Molecular Surface Physics & Nanoscience, Department of Physics, Chemistry and Biology, Linköping University, Linköping 58183, Sweden

\*Corresponding authors: [hwgao@tongji.edu.cn](mailto:hwgao@tongji.edu.cn) (H. W. Gao)

#### Figures S1 – S3 and Table S1 - S2

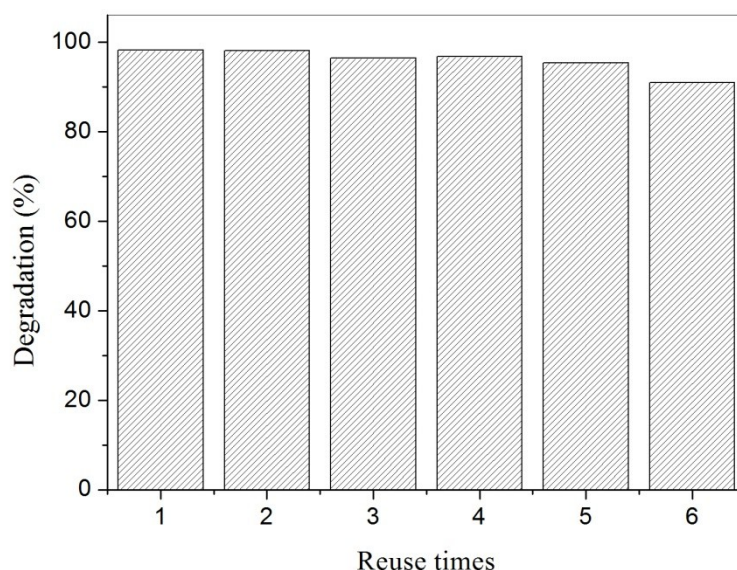

**Fig.S1** The repeated experiments in the photocatalytic degradation of 20 mg/L X3B in the presence of CTAB@BiOCl under UV light irradiation

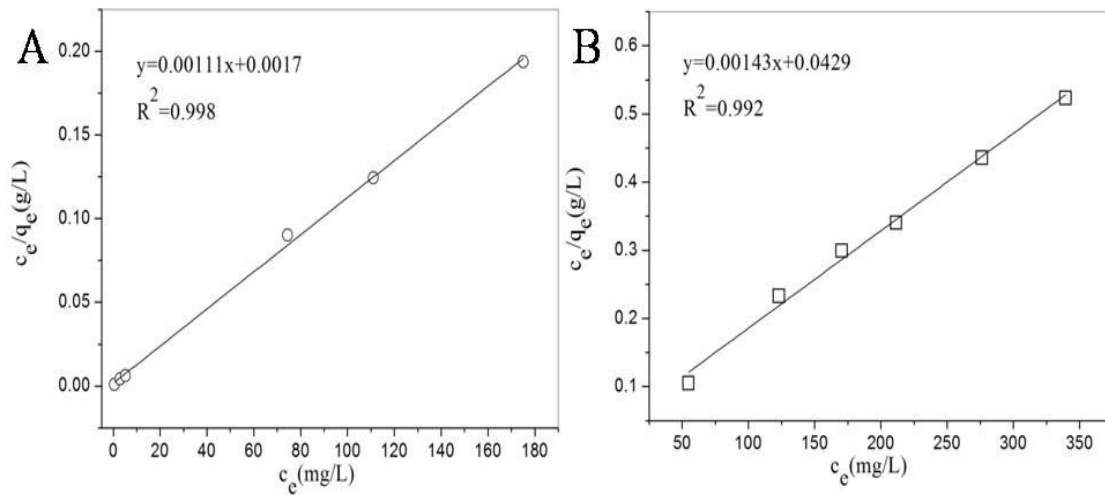

**Fig.S2** Langmuir isotherm model of CR (A) and X3B (B)

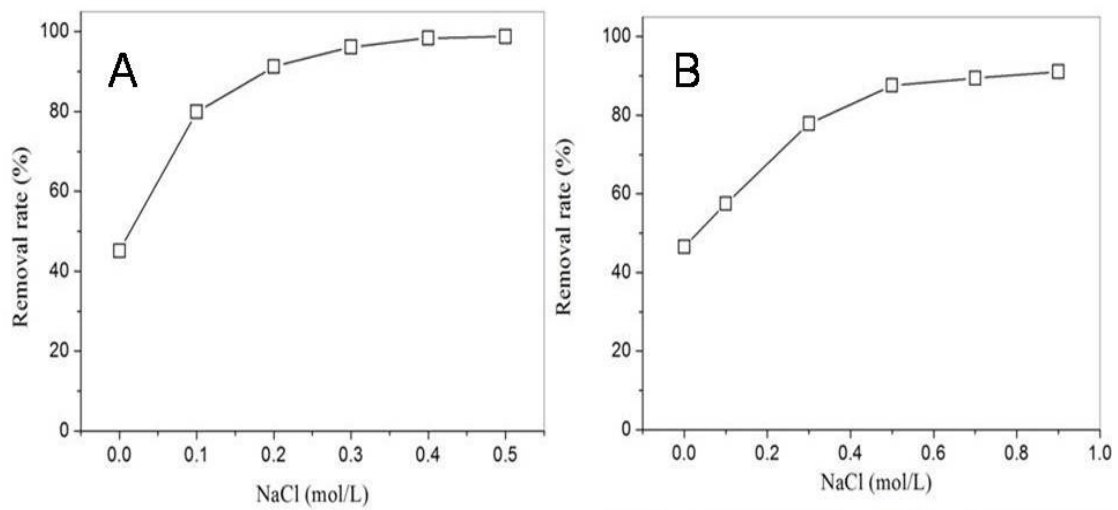

**Fig.S3** Effect of ionic strength on the adsorption of CR(A) and X3B(B)

**Table S1** Change of C, N and H contents in CTAB @ BiOCl by UV photocatalysis

| Number of use | N (%) | C (%) | H (%) |
|---------------|-------|-------|-------|
| 0             | 1.47  | 26.64 | 5.04  |
| 1             | 1.37  | 16.13 | 3.82  |
| 3             | 0.44  | 2.1   | 1.94  |
| 5             | 0     | 1.155 | 0.728 |

**Table S2** The change of  $\xi$ -potentials before and after adsorption reaction

| Material | CTAB @ BiOCl | 0.1mm CR solution | After adsorption of 0.1mm CR solution | 0.6mm CR solution | After adsorption of 0.6mm CR solution |
|----------|--------------|-------------------|---------------------------------------|-------------------|---------------------------------------|
| mV       | 41           | -25.4             | 26.6                                  | -32.4             | -3.31                                 |
